# Supplementary material
Source: Springer Nature journal article supplement (https://www.springermedizin.de/resource/supplementary/12936_2011_1810_MOESM6_ESM.pdf/9541780)
Supplement: MOESM6 [file 9541780]

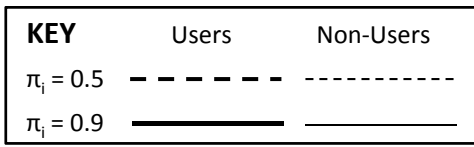

*An. arabiensis* with  
alternative hosts

*An. gambiae* with  
no alternative hosts

**Deterrent only**

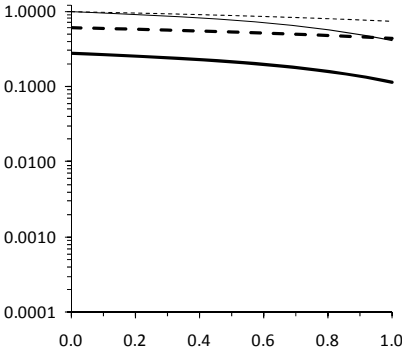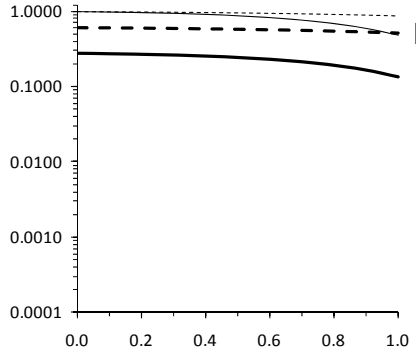

**Deterrent and pre-feed toxic**

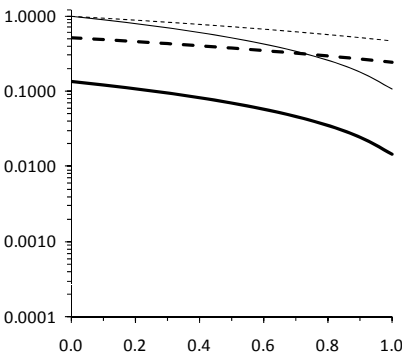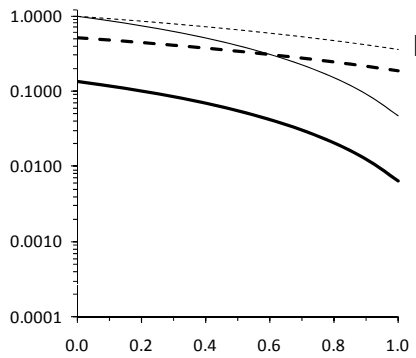

**Pre-feed toxic only**

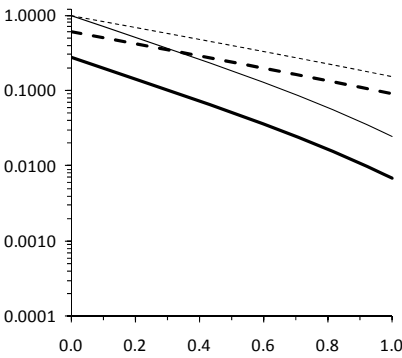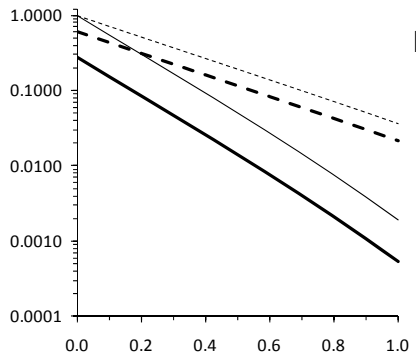

**Post-feed toxic only**

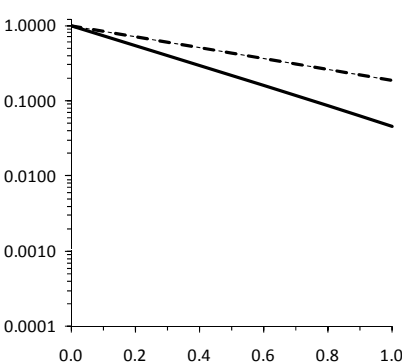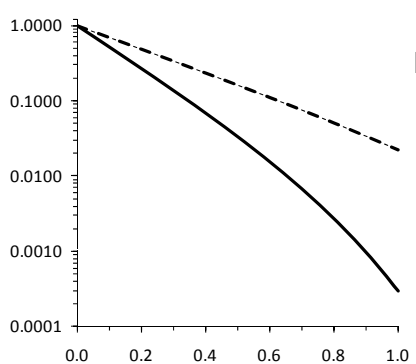

Relative exposure ( $\psi_{h,\Omega}$ )

Crude Coverage ( $C_h$ )
